# Supplementary material for: Mapping phosphate modifications of substituted lipid Aviaa targeted MS3CID/UVPD strategy
Source: Royal Society of Chemistry journal article supplement (doi:10.1039/c8an00561c), 2018-01-01
Supplement: c8an00561c1.pdf [file c8an00561c1.pdf]

## Mapping Phosphate Modifications of Substituted Lipid A via a Targeted MS<sup>3</sup> CID/UVPD Strategy

*Christopher M. Crittenden<sup>†</sup>, Carmen M. Herrera<sup>‡</sup>, Peggy E. Williams<sup>†</sup>, Dante P. Ricci<sup>§</sup>, Lee R. Swem<sup>§</sup>, M. Stephen Trent<sup>‡</sup>, Jennifer S. Brodbelt<sup>\*,†</sup>*

<sup>†</sup> Department of Chemistry, University of Texas at Austin, Austin, Texas 78712, USA

<sup>‡</sup> Department of Infectious Diseases, University of Georgia, Athens, Georgia 30602, USA

<sup>§</sup> Achaogen, Inc., 1 Tower Place, South San Francisco, CA, 94080, USA

\* Phone: (512) 471-0028, E-mail: [brodbelt@cm.utexas.edu](mailto:brodbelt@cm.utexas.edu)

### Supplemental Information

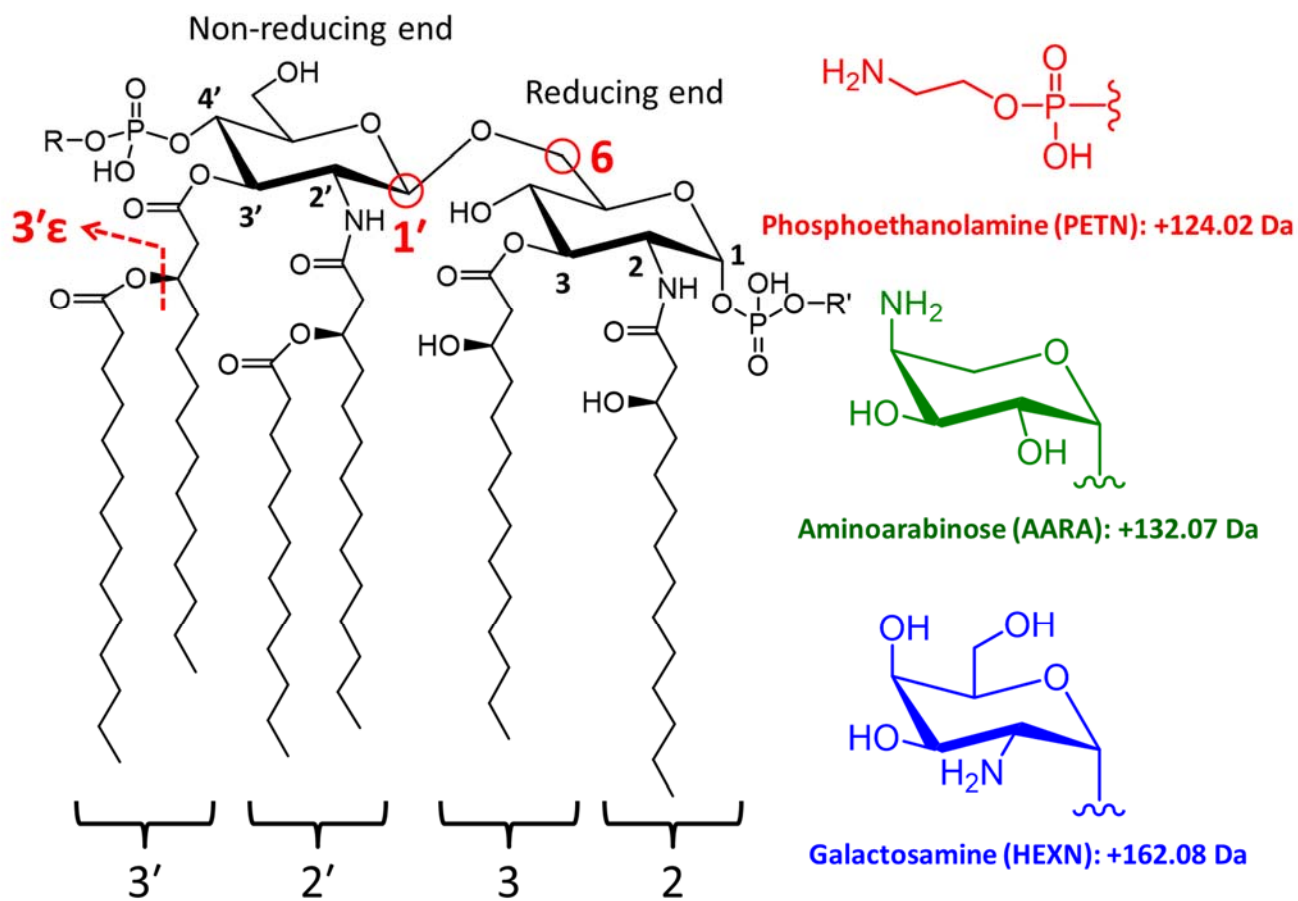

**Figure S1:** Structure of a typical hexaacylated lipid A. Potential substitutions are shown at the right: phosphoethanolamine (PETN, red); aminoarabinose (AARA, green); galactosamine (HEXN, blue).

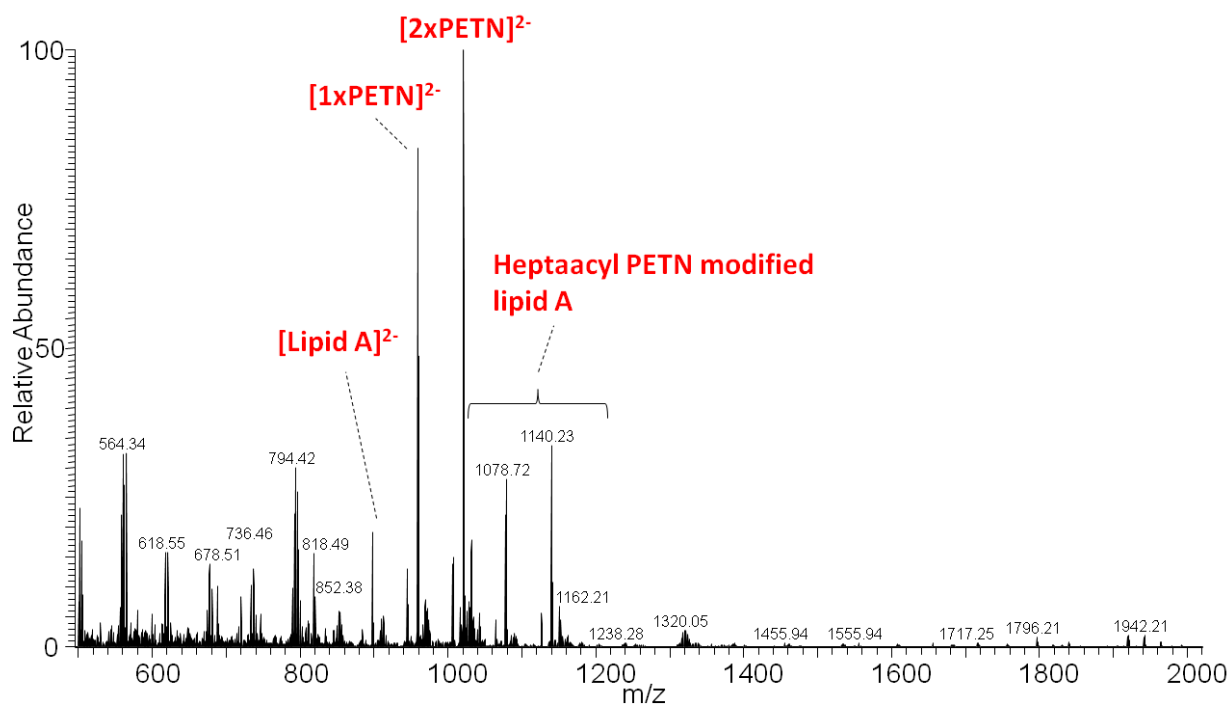

**Figure S2.** MS<sup>1</sup> spectrum of the sample SLAM 1. The region from  $m/z$  500 to 850 is typically congested with other biological contaminants and detergents utilized in the sample preparation procedure.

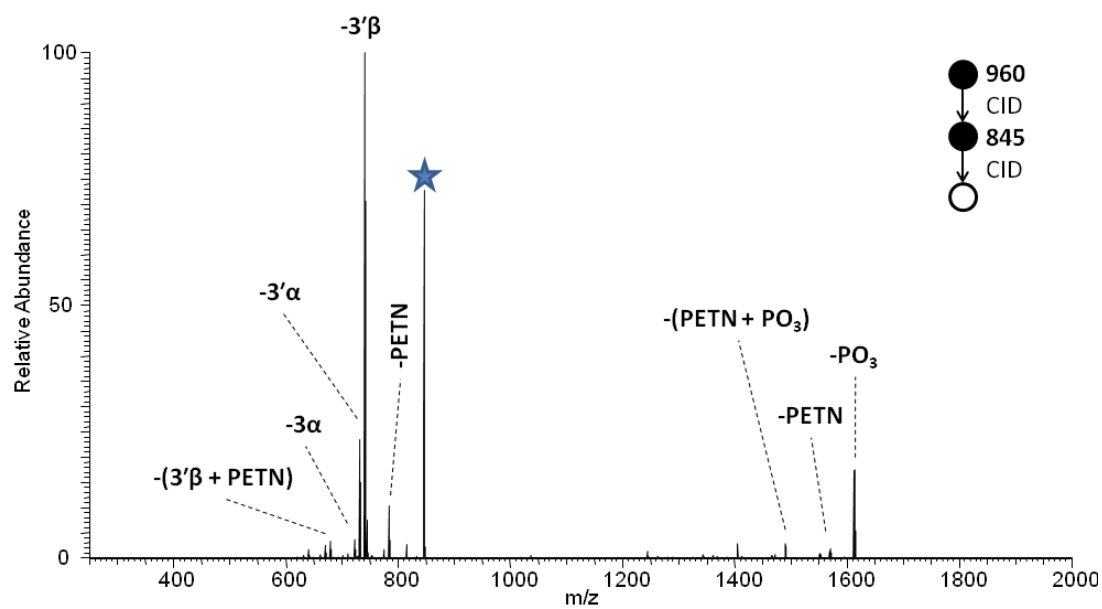

**Figure S3:** CID/CID ( $MS^3$ ) of the product ion corresponding to the loss of the 3' $\epsilon$  acyl chain ( $m/z$  845, 2-) from the singly PETN-modified lipid A ( $m/z$  960, 2-) from SLAM 1 in **Figure 2a**. Localization of the PETN moiety is not achieved through this method as the diagnostic fragments from glycosidic cleavages are absent. Note that the  $MS^2$  spectrum is shown in **Figure 3a**.

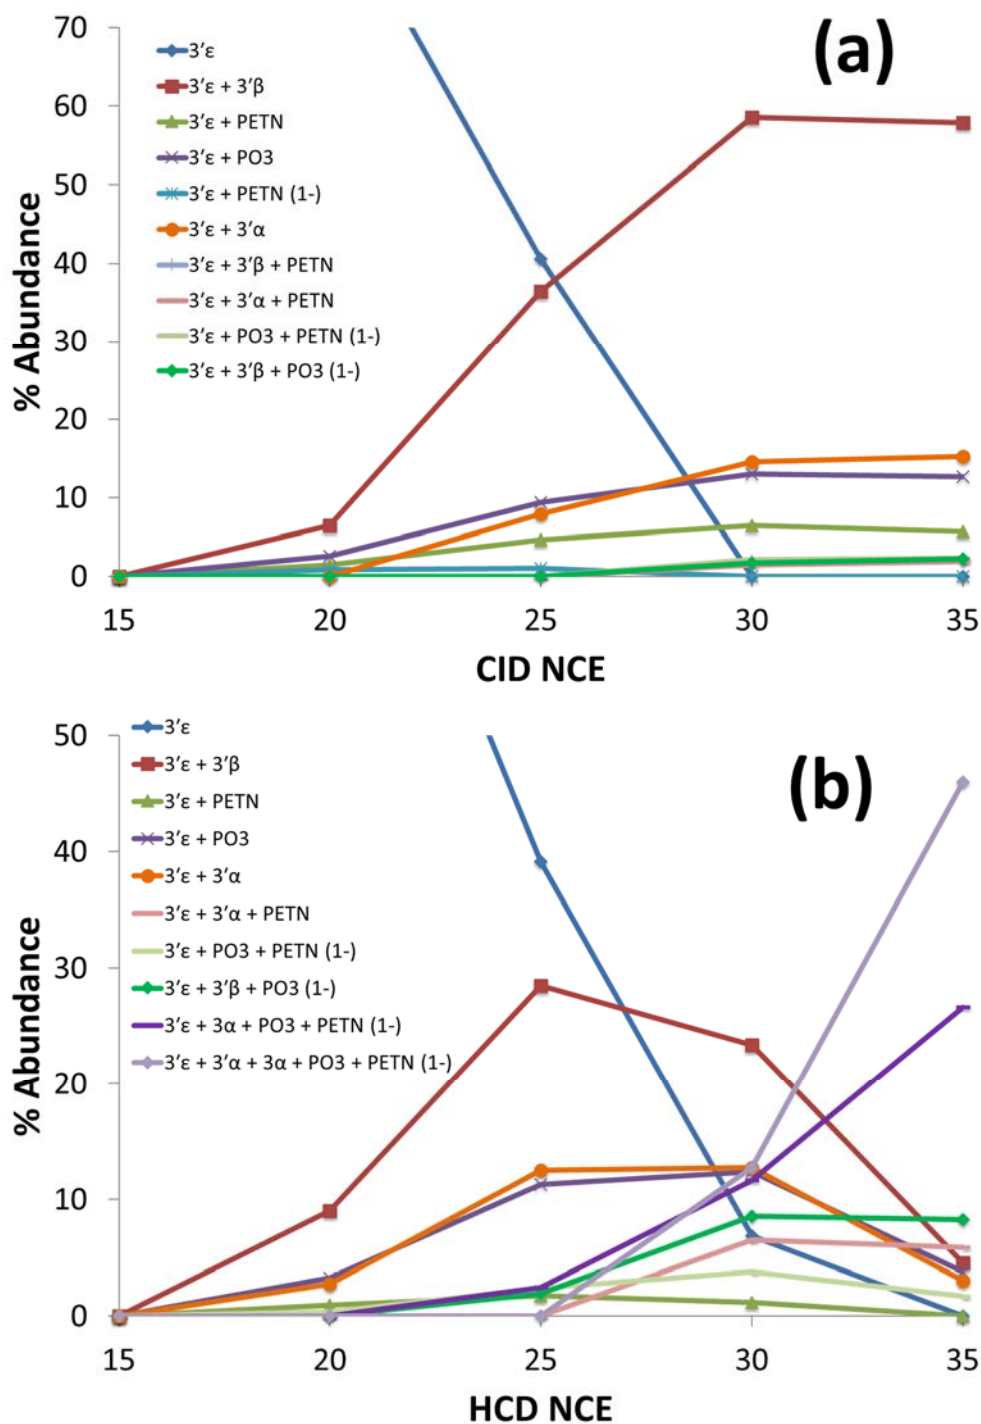

**Figure S4:** Energy variable CID/CID (a) and CID/HCD (b) of the product ion corresponding to the loss of 3'ε acyl chain ( $m/z$  845, 2-) of the singly PETN-modified lipid A from SLAM 1 in **Figure 2a**. The CID spectrum of the singly PETN-modified lipid A from SLAM 1 is shown in **Figure 3a**, and the loss of the 3'ε acyl chain is highlighted in green. Combinatorial losses of primary acyl chains, PETN, and PO<sub>3</sub> are the most dominant ions produced in this experiment.

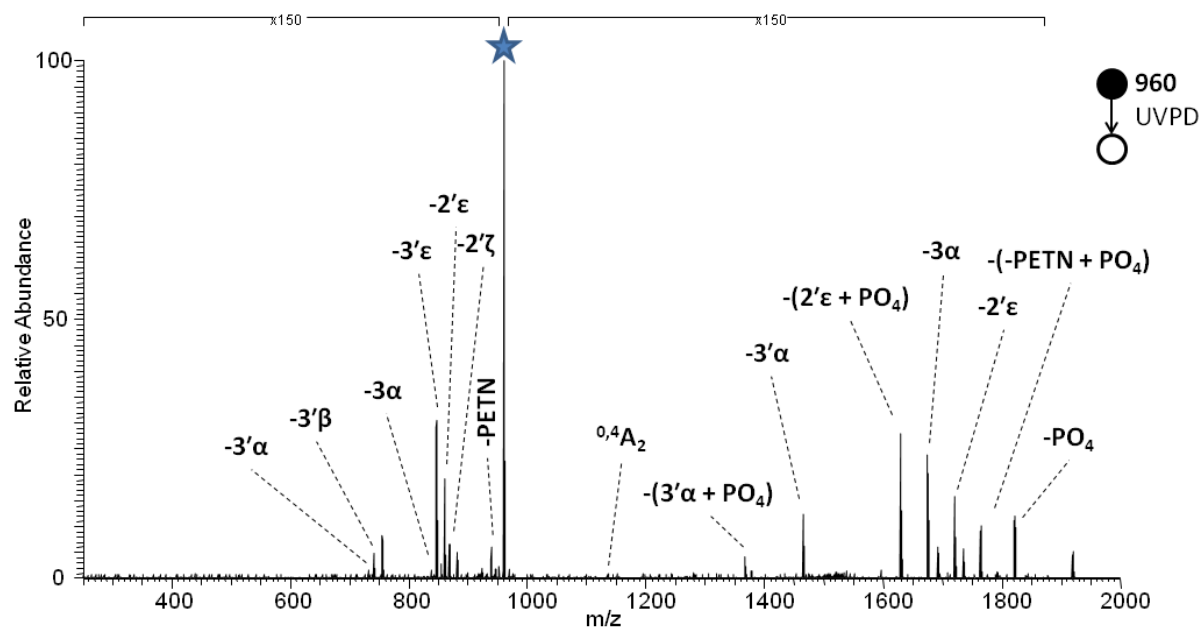

**Figure S5:** UVPD ( $MS^2$ ) of the PETN-modified lipid A ( $m/z$  960, 2-) from SLAM 1 in **Figure 1a**. UVPD allows localization of the PETN moiety via detection of the  $^{0,4}A_2$  cross-ring cleavage product but with lower abundance than the CID/UVPD method (**Figure 3**).

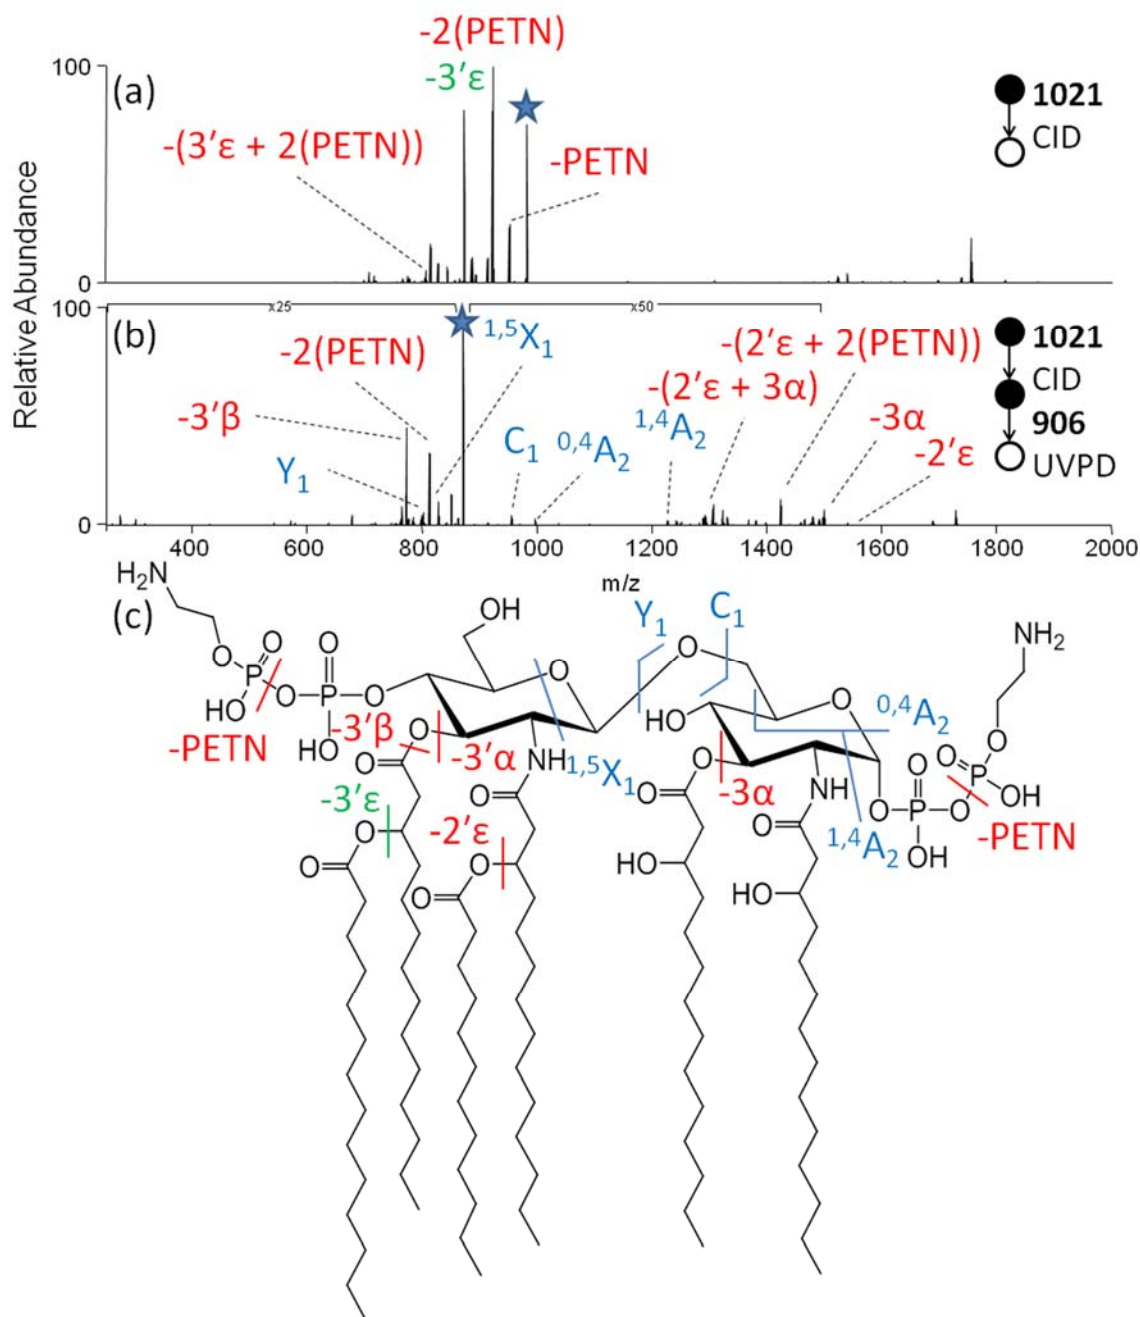

**Figure S6:** (a) CID of bis-PETN substituted lipid A of  $m/z$  1021 (2-) from SLAM 1 reveals labile acyl chain losses as well as a diagnostic neutral loss associated with PETN modifications. (b) UVPD of the ion corresponding to the loss of the 3'ε acyl chain ( $m/z$  906, 2-) provides diagnostic product ions that allow localization of the PETN substitution to the 4- and 1'-phosphate positions, as shown in (c), while additional identifications are shown in red.

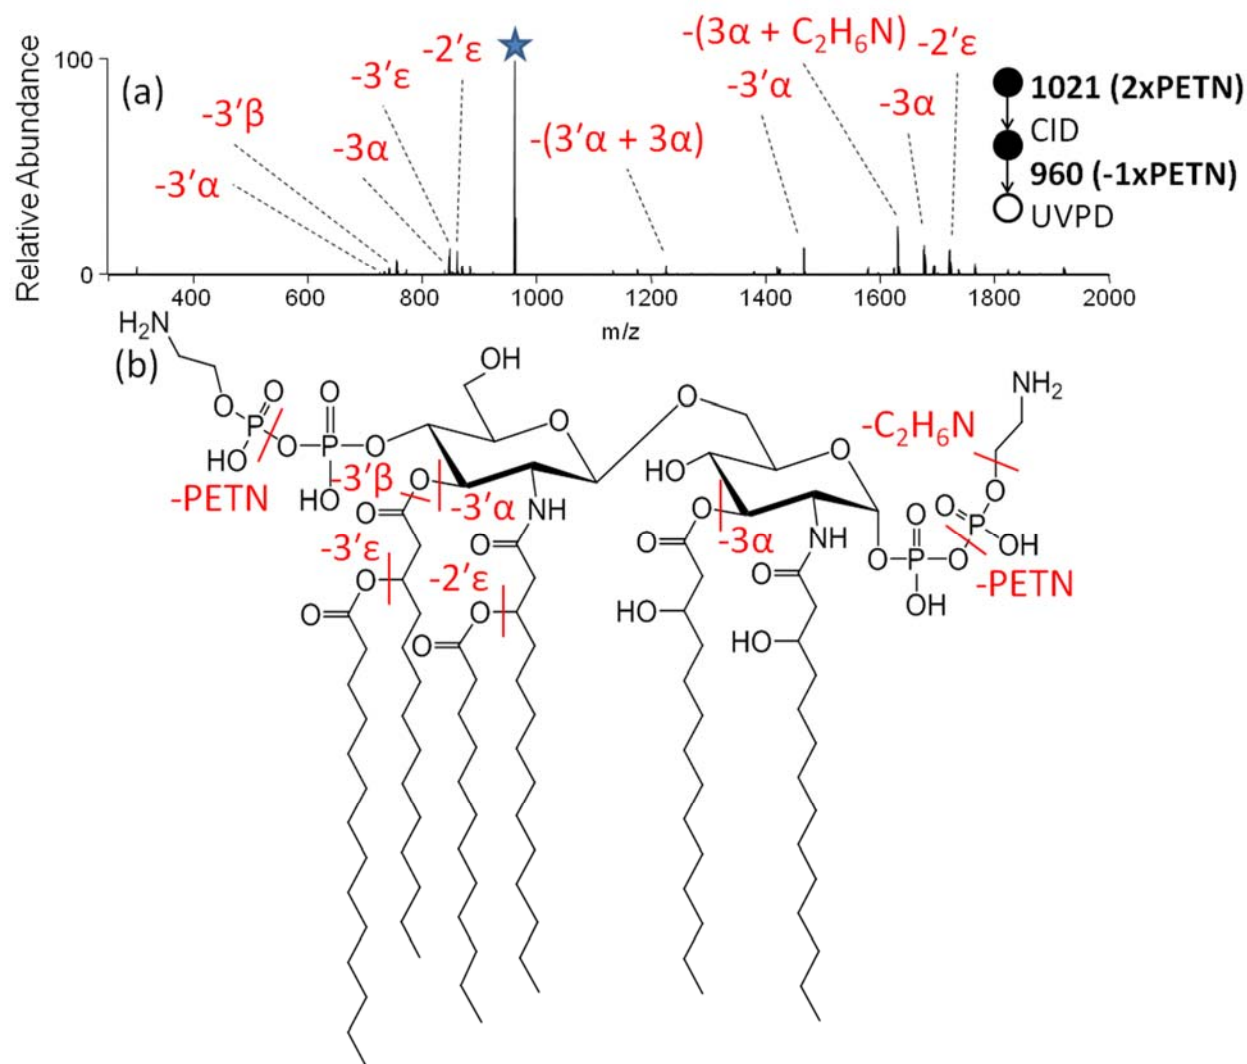

**Figure S7:** (a) UVPD of bis-PETN substituted lipid A of the ion corresponding to the loss of a single PETN moiety ( $m/z$  960, 2-) as produced by CID of the precursor ion of  $m/z$  1021 (2-). A combination of acyl chains were identified from this workflow (b), however diagnostic glycosidic fragmentation is absent.



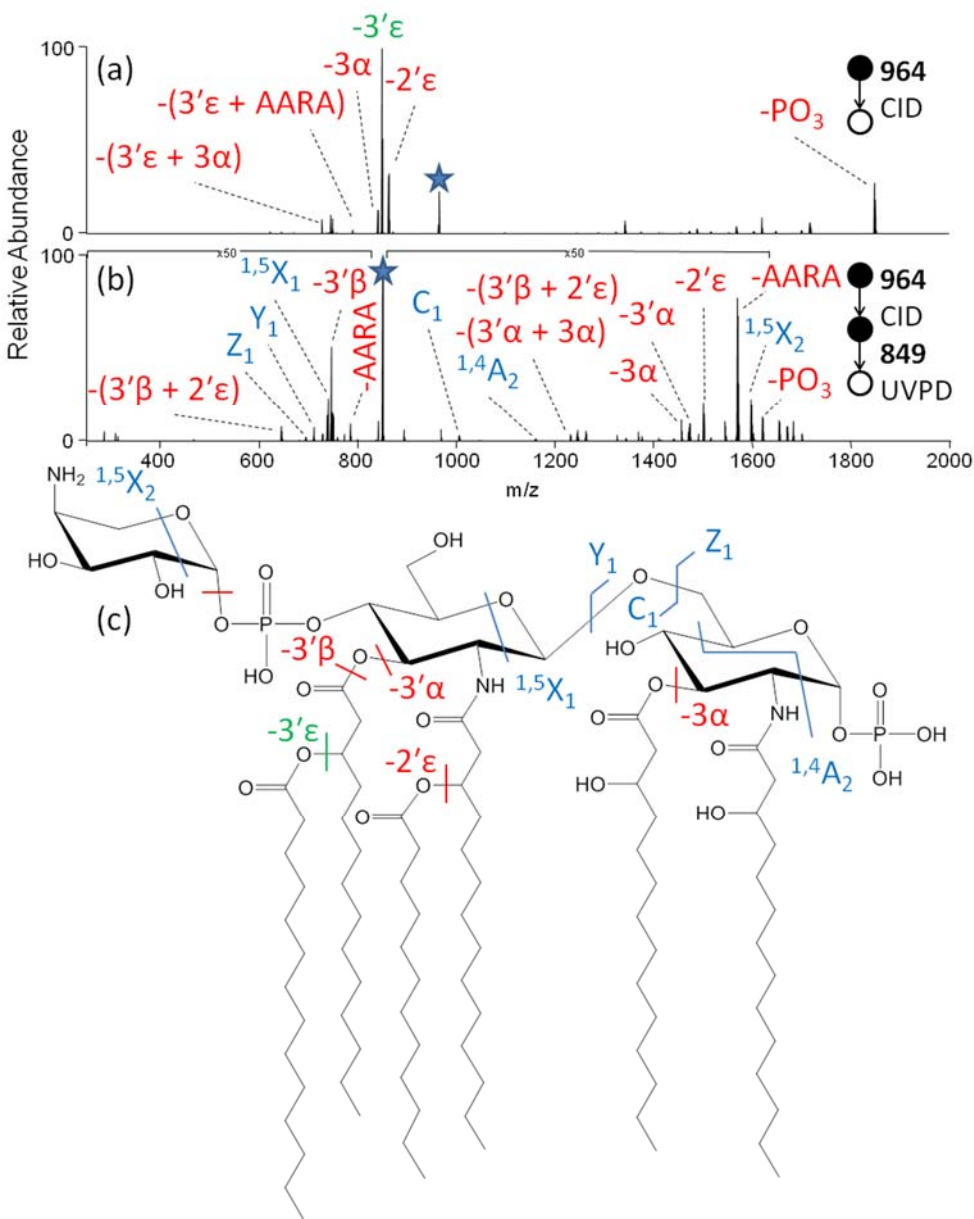

**Figure S8:** (a) CID of substituted lipid A from SLAM 2 at  $m/z$  964 (2-) reveals labile acyl chain losses as well as a diagnostic neutral loss associated with AARA modifications. (b) UVPD of the ion corresponding to the loss of the  $3'\epsilon$  acyl chain ( $m/z$  849, 2-, labeled green) provides diagnostic product ions (shown in blue) that allow localization of the AARA substitution to the 4'-phosphate position, as shown in (c), while additional identifications are shown in red. The selected precursor ion in each stage is marked with a star.

**Table S1:** Diagnostic fragment ions for 1xPETN lipid A from SLAM 1 (**Figure 3**). The  $m/z$  value of the precursor is given along the  $m/z$  value of the ion corresponding to the loss of the 3'ε acyl chain, and the  $m/z$  values for the diagnostic glycosidic fragment ions identified.

| Fragment Ion ID               | MS <sup>n</sup> | Theoretical ( $m/z$ ) | Observed ( $m/z$ ) | ppm error |
|-------------------------------|-----------------|-----------------------|--------------------|-----------|
| [M-2H] (1xPETN)               | MS <sup>1</sup> | 959.610               | 959.609            | -1.042    |
| 3'ε                           | MS <sup>2</sup> | 845.002               | 845.003            | 1.183     |
| <sup>1,4</sup> A <sub>2</sub> | MS <sup>3</sup> | 1148.569              | 1148.566           | -2.612    |
| <sup>0,4</sup> A <sub>2</sub> | MS <sup>3</sup> | 914.576               | 914.553            | -25.148   |
| <sup>1,5</sup> X <sub>1</sub> | MS <sup>3</sup> | 861.428               | 861.431            | 3.483     |
| Y <sub>1</sub>                | MS <sup>3</sup> | 833.433               | 833.439            | 7.120     |
| Z <sub>1</sub>                | MS <sup>3</sup> | 818.446               | 818.449            | 3.665     |

**Table S2:** Diagnostic fragment ions for 2xPETN lipid A from SLAM 1 (**Figure S6**). The  $m/z$  value of the precursor is given along with the  $m/z$  value of the ion corresponding to the loss of the 3'ε acyl chain, and the  $m/z$  values for the diagnostic glycosidic fragment ions.

| Fragment Ion ID               | MS <sup>n</sup> | Theoretical ( $m/z$ ) | Observed ( $m/z$ ) | ppm error |
|-------------------------------|-----------------|-----------------------|--------------------|-----------|
| [M-2H] (2xPETN)               | MS <sup>1</sup> | 1021.115              | 1021.113           | -1.959    |
| 3'ε                           | MS <sup>2</sup> | 906.507               | 906.506            | -1.103    |
| <sup>1,4</sup> A <sub>2</sub> | MS <sup>3</sup> | 1274.601              | 1274.585           | -12.553   |
| <sup>0,4</sup> A <sub>2</sub> | MS <sup>3</sup> | 1040.608              | 1040.611           | 2.883     |
| C <sub>1</sub>                | MS <sup>3</sup> | 996.582               | 996.589            | 7.024     |
| <sup>1,5</sup> X <sub>1</sub> | MS <sup>3</sup> | 861.428               | 861.428            | 0.000     |
| Y <sub>1</sub>                | MS <sup>3</sup> | 833.433               | 833.435            | 2.400     |

**Table S3:** Diagnostic fragment ions for 1xAARA lipid A from SLAM 2 (**Figure S8**). The  $m/z$  value of the precursor is given along with the  $m/z$  value for the ion corresponding to the loss of the 3'ε acyl chain, and the  $m/z$  values for the diagnostic glycosidic fragment ions.

| Fragment Ion ID               | MS <sup>n</sup> | Theoretical ( $m/z$ ) | Observed ( $m/z$ ) | ppm error |
|-------------------------------|-----------------|-----------------------|--------------------|-----------|
| [M-2H] (1xAARA)               | MS <sup>1</sup> | 963.635               | 963.632            | -3.113    |
| 3'ε                           | MS <sup>2</sup> | 849.027               | 849.027            | 0.000     |
| <sup>1,5</sup> X <sub>2</sub> | MS <sup>3</sup> | 1595.998              | 1595.999           | 0.627     |
| <sup>1,4</sup> A <sub>2</sub> | MS <sup>3</sup> | 1156.620              | 1156.619           | -0.865    |
| C <sub>1</sub>                | MS <sup>3</sup> | 1003.624              | 1003.623           | -0.996    |
| <sup>1,5</sup> X <sub>1</sub> | MS <sup>3</sup> | 738.419               | 738.420            | 1.354     |
| Y <sub>1</sub>                | MS <sup>3</sup> | 710.424               | 710.425            | 1.407     |

**Table S4:** Diagnostic fragment ions for 1xPETN 1xHEXN lipid A from SLAM 3 (**Figure 4**). The  $m/z$  value of the precursor is given along with the  $m/z$  value of the ion corresponding to the loss of the 3'ε acyl chain, and the  $m/z$  values for the diagnostic glycosidic fragment ions identified.

| Fragment Ion ID               | MS <sup>n</sup> | Theoretical ( $m/z$ ) | Observed ( $m/z$ ) | ppm error |
|-------------------------------|-----------------|-----------------------|--------------------|-----------|
| [M-2H] (1xPETN 1xHEXN)        | MS <sup>1</sup> | 1098.187              | 1098.165           | -20.033   |
| 3'ε                           | MS <sup>2</sup> | 997.090               | 997.086            | -4.012    |
| <sup>0,4</sup> A <sub>2</sub> | MS <sup>3</sup> | 1029.579              | 1029.569           | -9.713    |
| <sup>1,5</sup> X <sub>1</sub> | MS <sup>3</sup> | 1054.632              | 1054.641           | 8.534     |

**Table S5:** Diagnostic fragment ions for 2xAARA lipid A from SLAM 4 100 PMB (**Figure 5**). The  $m/z$  value of the precursor is given along with the  $m/z$  value of the ion corresponding to the loss of the 3'ε acyl chain, and the  $m/z$  values for the diagnostic glycosidic fragment ions identified.

| Fragment Ion ID               | MS <sup>n</sup> | Theoretical ( $m/z$ ) | Observed ( $m/z$ ) | ppm error |
|-------------------------------|-----------------|-----------------------|--------------------|-----------|
| [M-2H] (2xAARA)               | MS <sup>1</sup> | 1044.188              | 1044.183           | -4.788    |
| 3'ε                           | MS <sup>2</sup> | 929.076               | 929.074            | -2.152    |
| <sup>0,4</sup> A <sub>2</sub> | MS <sup>3</sup> | 1075.682              | 1075.684           | 1.859     |
| C <sub>1</sub>                | MS <sup>3</sup> | 1031.655              | 1031.658           | 2.908     |
| <sup>1,5</sup> X <sub>1</sub> | MS <sup>3</sup> | 869.478               | 869.480            | 2.300     |
| Y <sub>1</sub>                | MS <sup>3</sup> | 841.483               | 841.485            | 2.377     |
